# Supplementary material for: Time to first childbirth and its predictors among reproductive-age women in Ethiopia: survival analysis of recent evidence from the EDHS 2019
Source: PubMed Central journal article supplement (PMC10382129; doi:10.3389/frph.2023.1165204), 2023-07-14
Supplement: Table1.pdf [file Table1.pdf]

VIF and tolerance test to check the existence of multicollinearity between covariates

| <i>Variable</i>                              | <i>VIF</i> | <i>1/VIF</i> |
|----------------------------------------------|------------|--------------|
| <i>Residence</i>                             | 2.30       | 0.4347       |
| <i>Mother Educational Level</i>              | 1.72       | 0.5813       |
| <i>Knowledge of any contraceptive method</i> | 1.66       | 0.6024       |
| <i>Media exposure (Television)</i>           | 1.59       | 0.6289       |
| <i>Wealth index</i>                          | 1.51       | 0.6622       |
| <i>Marital status</i>                        | 1.36       | 0.7352       |
| <i>Household size</i>                        | 1.10       | 0.9090       |
| <i>Media exposure (Radio)</i>                | 1.09       | 0.9174       |
| <i>Mean VIF</i>                              | 1.54       |              |

Variance inflation factor (VIF) and tolerance were computed to check the existence of multicollinearity prior to running multivariable Weibull accelerated failure time (AFT) model. A VIF above 4 or tolerance below 0.25 indicated that multicollinearity might exist (42). In this study, the maximum VIF was 2.30 with mean VIF of 1.54 and the minimum tolerance value is 0.43. . Thus, there is no multicollinearity between covariates.
